# Supplementary material for: Solution stoichiometry determines crystal stoichiometry in halogen-bonded supramolecular complexes
Source: Royal Society of Chemistry journal article supplement (doi:10.1039/b702512m), 2007-01-01
Supplement: b702512m.pdf [file b702512m.pdf]

# Solution stoichiometry determines crystal stoichiometry in halogen-bonded supramolecular complexes†

Luca Russo,<sup>a</sup> Serena Biella,<sup>b</sup> Manu Lahtinen,<sup>a</sup> Rosalba Liantonio,<sup>b</sup> Pierangelo Metrangolo,<sup>\*b</sup> Giuseppe Resnati,<sup>\*b</sup> Kari Rissanen<sup>\*a</sup>

5 Receipt/Acceptance Data [DO NOT ALTER/DELETE THIS TEXT]

Publication data [DO NOT ALTER/DELETE THIS TEXT]

DOI: 10.1039/b000000x [DO NOT ALTER/DELETE THIS TEXT]

10

## ELECTRONIC SUPPLEMENTARY INFORMATION

<sup>a</sup> Nanoscience Centre, Department of Chemistry, University of Jyväskylä,  
PO Box 35, 40014 Jyväskylä, Finland. Fax: +358 14 260 2651;  
Tel: +358 14 260 2672; E-mail: [kari.rissanen@jyu.fi](mailto:kari.rissanen@jyu.fi)

<sup>b</sup> NFMLab – DCMIC “G. Natta”, Politecnico di Milano, 7, via  
Mancinelli, I-20131 Milan, Italy. Fax: +39 02 2399 3080;  
Tel: +39 02 2399 3041 (P. M.), 3032 (G. R.);

E-mail: [pierangelo.metrangolo@polimi.it](mailto:pierangelo.metrangolo@polimi.it); [giuseppe.resnati@polimi.it](mailto:giuseppe.resnati@polimi.it)

† Electronic Supplementary Information (ESI) available: Experimental  
procedures, IR and DSC characterization, CIFs for **3a,b**.

See <http://dx.doi.org/10.1039/b000000x/>

## Experimental Section

**Reagents.** Methylisonicotinate (MINC, **1**) was used as purchased from Aldrich (98% pure), without any further purification; 1,4-diiodotetrafluorobenzene (DITFB, **2**) was used as purchased from Apollo Scientific Ltd. (98% pure), without any further purification. HPLC grade solvents were used for the crystallization methods.

**Supramolecular synthesis.** 1:1 DITFB to MINC ratio compound (**3a**). 83 mg of DITFB and 28 mg of MINC (about 1:1 ratio) were dissolved in methanol: the solvent was allowed to slowly evaporate until dryness. At this point the product was obtained in crystalline form, suitable for single-crystal x-ray structure determination. The product was dried *in vacuo* overnight for further analysis. 1:2 DITFB to MINC ratio compound (**3b**). 80 mg of DITFB and 268 mg of MINC (about 1:20 ratio) were dissolved in methanol: the solvent was allowed to slowly evaporate from the resulting solution, until the product was obtained in crystalline form, suitable for single-crystal x-ray structure determination. The crystals were then mechanically separated, washed with water and dried *in vacuo* overnight for further analysis.

**Crystallography, single-crystal diffraction.** For both the products **3a,b** X-ray single-crystal data collection was performed on a BRUKER-NONIUS KAPPA CCD diffractometer, geared with graphite-monochromated Mo K $\alpha$  radiation ( $\lambda=0.71073$  Å) and provided of an APEXII area detector and an OXFORD CRYOSTREAM cryogenic device. Data collection: COLLECT. Cell refinement and data reduction: EVALCCD. Absorption corrections: SADABS. Structure solution and refinement SHELXTL.

**Crystallography, powder diffraction.** X-ray powder diffraction data collection was performed on a Huber G670 imaging-plate Guinier camera, geared with pure line-focused CuK $\alpha_1$  radiation ( $\lambda=1.5406$  Å). The measurements were carried out in Guinier-type transmission geometry with 45° angle between the incident beam and the sample normal. The hand-ground samples were prepared on a paraffine-

---

coated Mylar foil of 3.5  $\mu\text{m}$  thickness. Simulated powder patterns were calculated from the single-crystal diffraction data, using Diamond 3.0a<sup>1</sup>.

**General analysis.** DSC measurements were carried out using 50  $\mu\text{l}$  sealed aluminium sample pans with pinholes. The temperature calibration was carried out using three standard materials (*n*-decane, In, Zn) and the energy calibration using In standard. The samples were heated under nitrogen (flow rate of 50 ml/min) at the rate of 10°C/min from  $-50\text{ C}$ , up to the boiling point. IR measurements were performed on KBr tablets (DITFB) or on thin liquid film supported on NaCl (MINC), using a Perkin-Elmer System 2000 FT-IR.

**Crystal data and structure refinement for 3a.**

|                                       |                                                                                              |                        |
|---------------------------------------|----------------------------------------------------------------------------------------------|------------------------|
| Chemical formula (moiety)             | C <sub>6</sub> F <sub>4</sub> I <sub>2</sub> ·C <sub>7</sub> H <sub>7</sub> O <sub>2</sub> N |                        |
| Chemical formula (total)              | C <sub>13</sub> H <sub>7</sub> F <sub>4</sub> I <sub>2</sub> NO <sub>2</sub>                 |                        |
| Formula weight                        | 539.00                                                                                       |                        |
| Temperature                           | 173(2) K                                                                                     |                        |
| Radiation, wavelength                 | MoK $\alpha$ , 0.71073 Å                                                                     |                        |
| Crystal system, space group           | triclinic, P $\bar{1}$                                                                       |                        |
| Unit cell parameters                  | a = 6.4055(13) Å                                                                             | $\alpha$ = 78.22(3)°   |
|                                       | b = 9.589(2) Å                                                                               | $\beta$ = 86.37(3)°    |
|                                       | c = 13.479(5) Å                                                                              | $\gamma$ = 73.407(15)° |
| Cell volume                           | 776.7(4) Å <sup>3</sup>                                                                      |                        |
| Z                                     | 2                                                                                            |                        |
| Calculated density                    | 2.305 g/cm <sup>3</sup>                                                                      |                        |
| Absorption coefficient $\mu$          | 4.095 mm <sup>-1</sup>                                                                       |                        |
| F(000)                                | 500                                                                                          |                        |
| Crystal colour and size               | colourless, 0.60 × 0.05 × 0.05 mm <sup>3</sup>                                               |                        |
| Reflections for cell refinement       | 2428 ( $\theta$ range 2.5 to 27.5°)                                                          |                        |
| Data collection method                | Nonius KappaCCD diffractometer<br>$\phi$ and $\omega$ scans                                  |                        |
| $\theta$ range for data collection    | 3.3 to 27.6°                                                                                 |                        |
| Index ranges                          | h -8 to 7, k -12 to 12, l -17 to 17                                                          |                        |
| Completeness to $\theta = 27.6^\circ$ | 98.7 %                                                                                       |                        |
| Reflections collected                 | 11047                                                                                        |                        |
| Independent reflections               | 3558 ( $R_{\text{int}} = 0.0284$ )                                                           |                        |
| Reflections with $F^2 > 2\sigma$      | 2970                                                                                         |                        |
| Absorption correction                 | semi-empirical from equivalents                                                              |                        |
| Min. and max. transmission            | 0.1925 and 0.8214                                                                            |                        |
| Structure solution                    | direct methods                                                                               |                        |
| Refinement method                     | Full-matrix least-squares on $F^2$                                                           |                        |
| Weighting parameters a, b             | 0.0121, 0.1306                                                                               |                        |
| Data / restraints / parameters        | 3558 / 0 / 199                                                                               |                        |
| Final R indices [ $F^2 > 2\sigma$ ]   | R1 = 0.0270, wR2 = 0.0415                                                                    |                        |
| R indices (all data)                  | R1 = 0.0385, wR2 = 0.0459                                                                    |                        |
| Goodness-of-fit on $F^2$              | 1.118                                                                                        |                        |
| Largest and mean shift/su             | 0.002 and 0.000                                                                              |                        |
| Largest diff. peak and hole           | 0.46 and -0.60 e Å <sup>-3</sup>                                                             |                        |

### Crystal data and structure refinement for 3b.

|                                       |                                                                                              |                        |
|---------------------------------------|----------------------------------------------------------------------------------------------|------------------------|
| Chemical formula (moiety)             | 2C <sub>7</sub> H <sub>7</sub> O <sub>2</sub> N·C <sub>6</sub> F <sub>4</sub> I <sub>2</sub> |                        |
| Chemical formula (total)              | C <sub>20</sub> H <sub>14</sub> F <sub>4</sub> I <sub>2</sub> N <sub>2</sub> O <sub>4</sub>  |                        |
| Formula weight                        | 676.13                                                                                       |                        |
| Temperature                           | 173(2) K                                                                                     |                        |
| Radiation, wavelength                 | MoK $\alpha$ , 0.71073 Å                                                                     |                        |
| Crystal system, space group           | triclinic, P $\bar{1}$                                                                       |                        |
| Unit cell parameters                  | a = 4.1581(4) Å                                                                              | $\alpha$ = 91.102(11)° |
|                                       | b = 10.7974(8) Å                                                                             | $\beta$ = 97.913(12)°  |
|                                       | c = 12.7958(19) Å                                                                            | $\gamma$ = 90.912(8)°  |
| Cell volume                           | 568.81(11) Å <sup>3</sup>                                                                    |                        |
| Z                                     | 1                                                                                            |                        |
| Calculated density                    | 1.974 g/cm <sup>3</sup>                                                                      |                        |
| Absorption coefficient $\mu$          | 2.826 mm <sup>-1</sup>                                                                       |                        |
| F(000)                                | 322                                                                                          |                        |
| Crystal colour and size               | colourless, 0.60 × 0.30 × 0.15 mm <sup>3</sup>                                               |                        |
| Reflections for cell refinement       | 2343 ( $\theta$ range 2.5 to 27.5°)                                                          |                        |
| Data collection method                | Nonius KappaCCD diffractometer<br>$\phi$ and $\omega$ scans                                  |                        |
| $\theta$ range for data collection    | 5.2 to 27.6°                                                                                 |                        |
| Index ranges                          | h -4 to 5, k -13 to 13, l -15 to 16                                                          |                        |
| Completeness to $\theta = 27.6^\circ$ | 83.9 %                                                                                       |                        |
| Reflections collected                 | 6768                                                                                         |                        |
| Independent reflections               | 2217 ( $R_{\text{int}} = 0.0279$ )                                                           |                        |
| Reflections with $F^2 > 2\sigma$      | 2038                                                                                         |                        |
| Absorption correction                 | semi-empirical from equivalents                                                              |                        |
| Min. and max. transmission            | 0.2819 and 0.6765                                                                            |                        |
| Structure solution                    | direct methods                                                                               |                        |
| Refinement method                     | Full-matrix least-squares on $F^2$                                                           |                        |
| Weighting parameters a, b             | 0.0000, 0.3199                                                                               |                        |
| Data / restraints / parameters        | 2217 / 0 / 145                                                                               |                        |
| Final R indices [ $F^2 > 2\sigma$ ]   | R1 = 0.0179, wR2 = 0.0384                                                                    |                        |
| R indices (all data)                  | R1 = 0.0245, wR2 = 0.0427                                                                    |                        |
| Goodness-of-fit on $F^2$              | 1.167                                                                                        |                        |
| Largest and mean shift/su             | 0.001 and 0.000                                                                              |                        |
| Largest diff. peak and hole           | 0.53 and -0.51 e Å <sup>-3</sup>                                                             |                        |

**DSC data.**

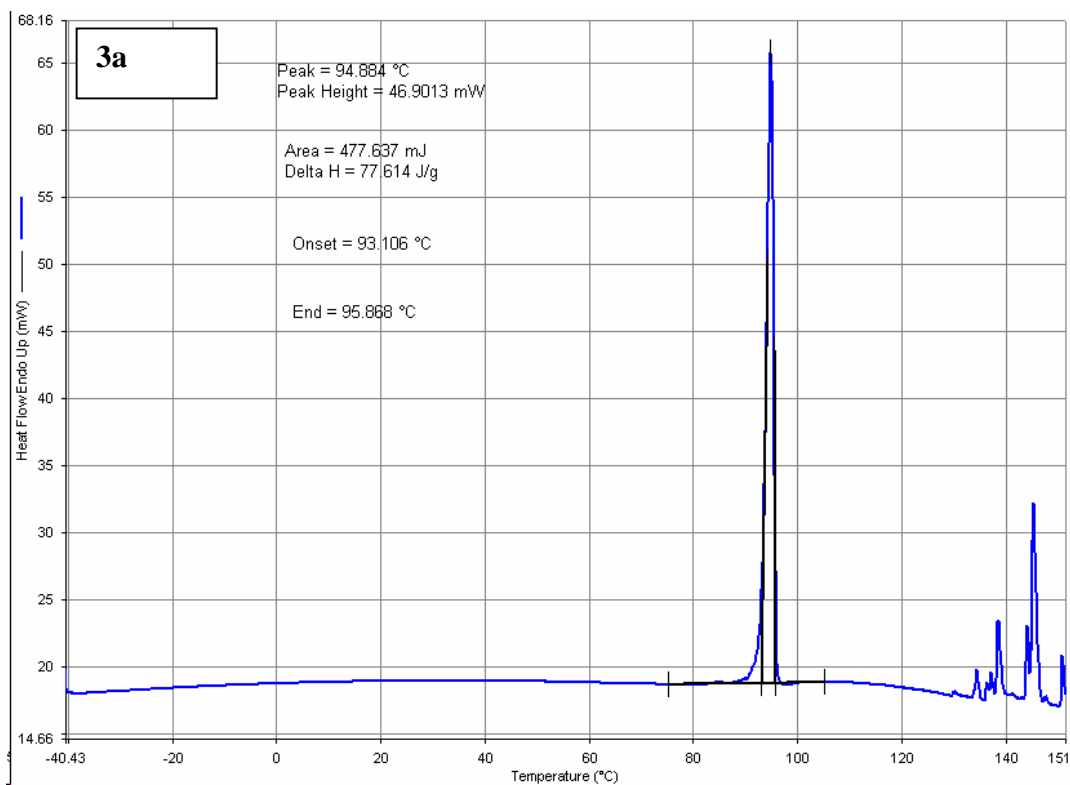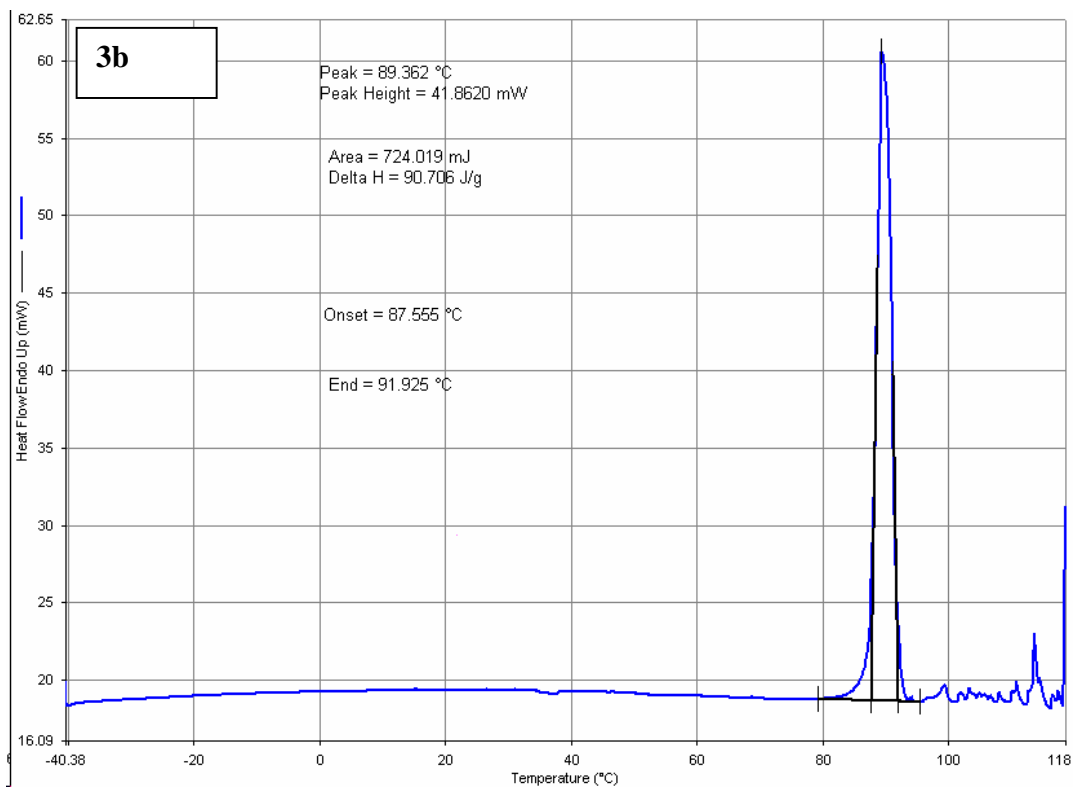

**IR data.**

**1**

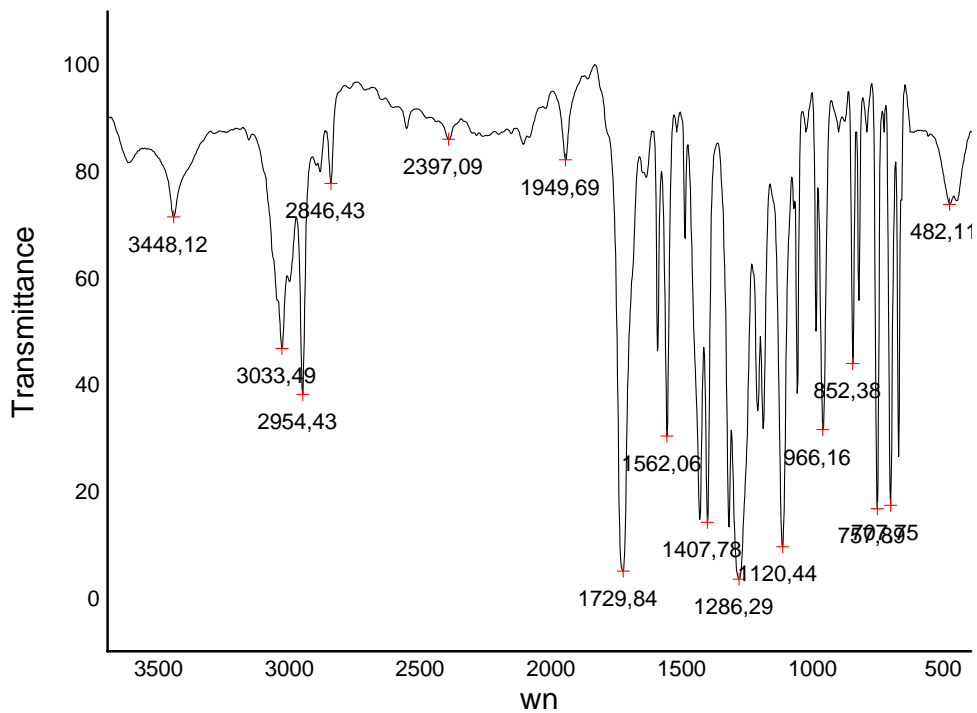

**2**

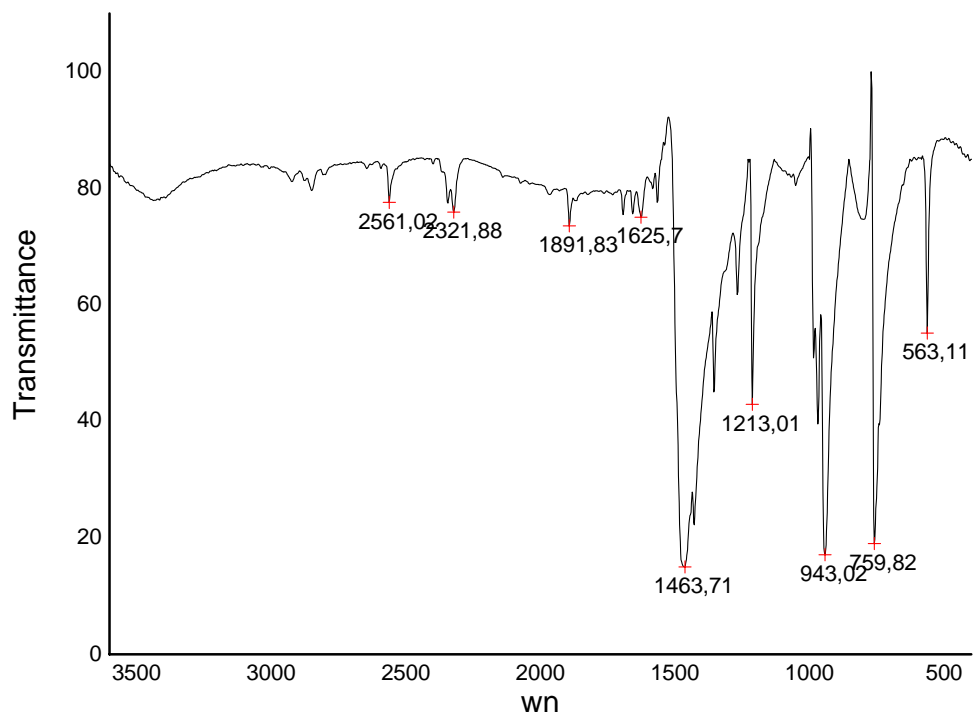

**3a**

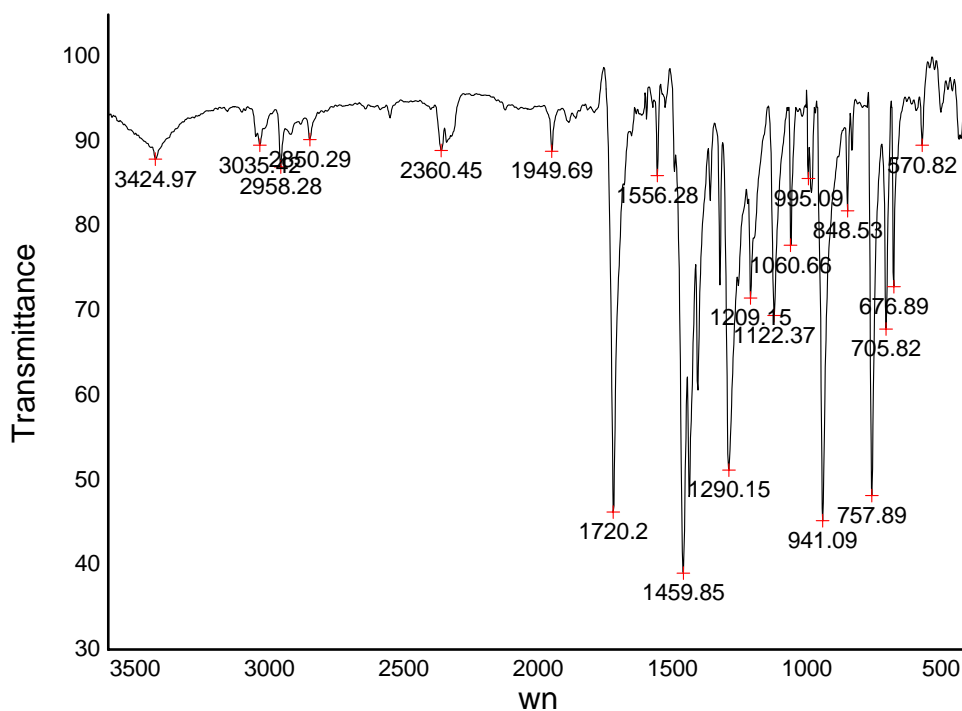

**3b**

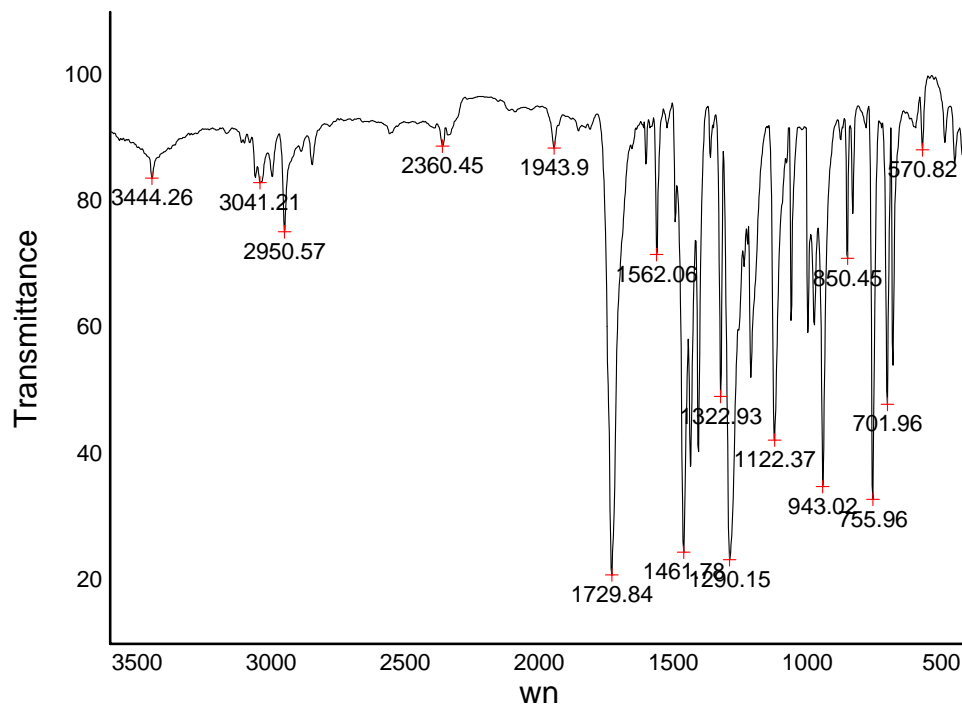



**Powder X-ray diffraction data.**

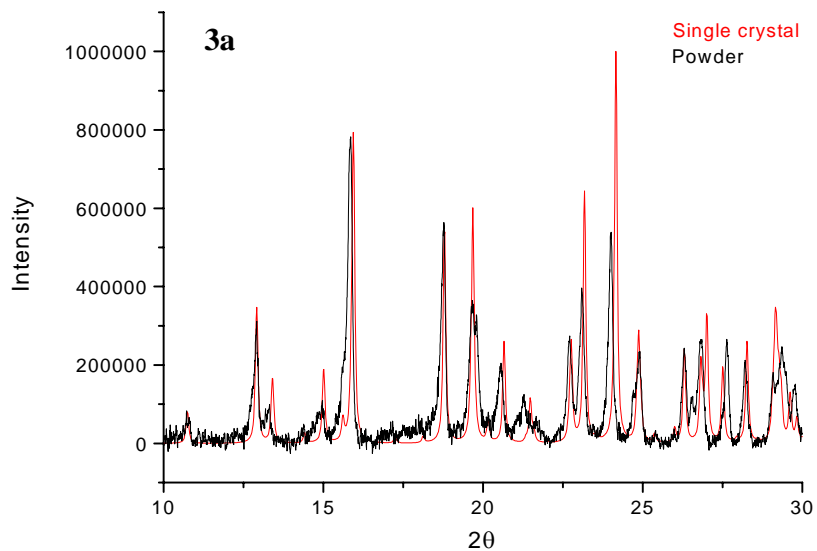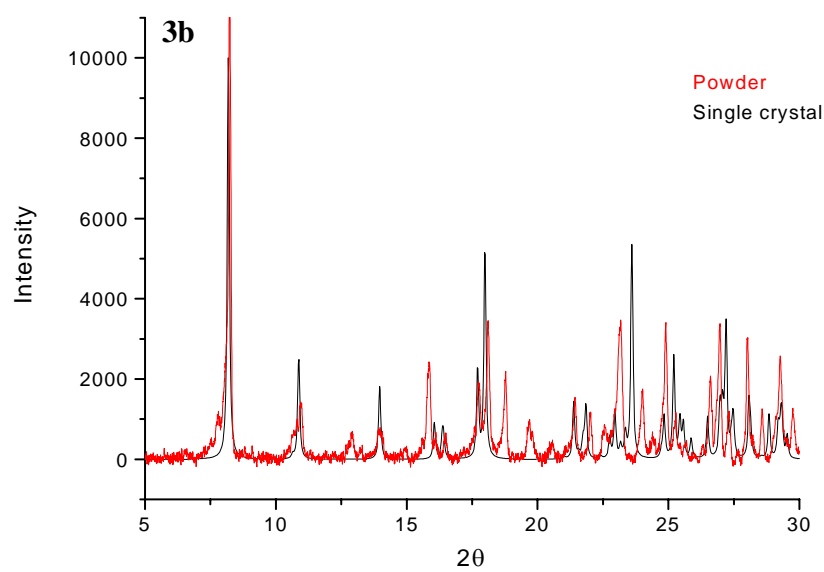

<sup>1</sup> Brandenburg, K. *DIAMOND 3.0a*; Crystal Impact GbR, Bonn, Germany.
